# Supplementary material for: The Evolution of Primate Litter Size
Source: MDPI journal article supplement (doi:10.3390/humans4030014), 2024-07-19
Supplement: s1 [file s1]

## Sheet: S3.1.Node Values
Boreoeutheria Node #	Value	Transformed	Euarchonta Node #	Value	Transformed	Primates Node #	Value	Transformed
947	0.275749	1.8869	164	0.0902488	1.23097	156	0.0400507	1.09661
948	0.264926	1.84046	165	0.0865723	1.2206	157	0.0589313	1.14533
949	0.268625	1.8562	166	0.077109	1.19429	158	0.0741368	1.18614
950	0.287035	1.93658	167	0.0773295	1.19489	159	0.10688	1.27903
951	0.542428	3.4868	168	0.108317	1.28327	160	0.143075	1.39019
952	0.545256	3.50959	169	0.14332	1.39098	161	0.0632942	1.1569
953	0.541448	3.47895	170	0.0653709	1.16244	162	0.0715879	1.1792
954	0.560158	3.6321	171	0.0725704	1.18187	163	0.106982	1.27933
955	0.333958	2.15753	172	0.107316	1.28031	164	0.158174	1.43938
956	0.553415	3.57614	173	0.158192	1.43944	165	0.10684	1.27891
957	0.546459	3.51932	174	0.107025	1.27946	166	0.104467	1.27194
958	0.575175	3.75989	175	0.104594	1.27231	167	0.0929768	1.23873
959	0.574727	3.75602	176	0.0930149	1.23884	168	0.0321771	1.0769
960	0.5798	3.80014	177	0.0332328	1.07953	169	0.0618094	1.15295
961	0.576653	3.7727	178	0.0730786	1.18326	170	0.094047	1.24179
962	0.600659	3.98712	179	0.0964131	1.24857	171	0.0236039	1.05585
963	0.650446	4.47142	180	0.0241977	1.0573	172	0.0189841	1.04468
964	0.674956	4.73104	181	0.0194617	1.04583	173	0.00477947	1.01107
965	0.716811	5.20968	182	0.00489971	1.01135	174	0.110172	1.28876
966	0.783862	6.07941	183	0.111812	1.29364	175	0.1275	1.34122
967	0.704672	5.06608	184	0.128005	1.34278	176	0.299352	1.99229
968	0.765057	5.8218	185	0.299383	1.99243	177	0.0900575	1.23043
969	0.77631	5.97462	186	0.0903277	1.2312	178	0.0389045	1.09372
970	0.778387	6.00325	187	0.0389739	1.09389	179	0.0352992	1.08467
971	0.774269	5.94661	188	0.035359	1.08482	180	0.0294998	1.07029
972	0.753488	5.66876	189	0.0295359	1.07037	181	0.0780096	1.19677
973	0.690514	4.90359	190	0.0780589	1.1969	182	0.0767548	1.19331
974	0.722144	5.27405	191	0.0768021	1.19344	183	0.0429904	1.10405
975	0.720767	5.25735	192	0.0430107	1.10411	184	0.014622	1.03424
976	0.714617	5.18343	193	0.0146289	1.03426	185	0.126326	1.3376
977	0.720529	5.25447	194	0.127349	1.34075	186	0.119913	1.31799
978	0.706248	5.0845	195	0.120885	1.32095	187	0.0291735	1.06948
979	0.757919	5.72689	196	0.0294098	1.07006	188	0.228417	1.69207
980	0.392563	2.46924	197	0.228915	1.69401	189	0.319525	2.08701
981	0.538568	3.45596	198	0.319632	2.08752	190	0.271707	1.86942
982	0.438423	2.74425	199	0.271946	1.87045	191	0.311325	2.04798
983	0.561008	3.63921	200	0.311442	2.04853	192	0.0368873	1.08865
984	0.558578	3.61891	201	0.077605	1.19565	193	0.00194346	1.00449
985	0.526376	3.36028	202	0.00408873	1.00946	194	0.0273119	1.06491
986	0.694261	4.94608	203	0.0377543	1.09082	195	0.0436263	1.10567
987	0.712298	5.15582	204	0.0451981	1.10968	196	0.0367459	1.08829
988	0.249187	1.77495	205	0.0380107	1.09147	197	0.0246739	1.05846
989	0.121977	1.32427	206	0.0251391	1.05959	198	0.033403	1.07995
990	0.0767553	1.19332	207	0.0334371	1.08003	199	0.0138026	1.03229
991	0.0578456	1.14247	208	0.0142777	1.03342	200	0.00469154	1.01086
992	0.0119714	1.02795	209	0.00485302	1.01124	201	0.00127304	1.00294
993	0.0275611	1.06552	210	0.00131686	1.00304	202	0.0563604	1.13857
994	0.00419692	1.00971	211	0.0572797	1.14098	203	0.0813386	1.20598
995	0.00389951	1.00902	212	0.0818509	1.2074	204	0.170728	1.48159
996	0.00182098	1.0042	213	0.170967	1.48241	205	0.186637	1.53687
997	0.0247412	1.05862	214	0.186809	1.53748	206	0.189233	1.54608
998	0.0244734	1.05797	215	0.189352	1.54651	207	0.253228	1.79155
999	0.0377241	1.09075	216	0.253279	1.79176	208	0.292153	1.95954
1000	0.0199807	1.04708	217	0.292163	1.95958	209	0.299386	1.99244
1001	0.0224833	1.05313	218	0.299388	1.99245	210	0.300222	1.99628
1002	0.00169966	1.00392	219	0.300223	1.99628	211	0.268228	1.8545
1003	0.0442103	1.10716	220	0.268262	1.85465	212	0.29914	1.99132
1004	0.0161652	1.03792	221	0.299143	1.99133	213	0.300026	1.99538
1005	0.0192004	1.0452	222	0.300027	1.99539	214	0.256254	1.80407
1006	0.0166584	1.0391	223	0.256316	1.80433	215	0.281864	1.91365
1007	0.00806986	1.01876	224	0.281885	1.91375	216	0.28873	1.94415
1008	0.00858753	1.01997	225	0.288733	1.94416	217	0.271668	1.86925
1009	0.00557842	1.01293	226	0.271687	1.86933	218	0.28184	1.91355
1010	0.00280059	1.00647	227	0.281851	1.9136	219	0.288653	1.94381
1011	0.000797626	1.00184	228	0.288654	1.94381	220	0.26074	1.8228
1012	0.00111451	1.00257	229	0.260745	1.82283	221	0.073384	1.18409
1013	0.00024355	1.00056	230	0.0738462	1.18535	222	0.0666731	1.16593
1014	0.000205634	1.00047	231	0.0670931	1.16706	223	0.00272059	1.00628
1015	0.000155288	1.00036	232	0.00273773	1.00632	224	0.00195731	1.00452
1016	0.025894	1.06144	233	0.00196964	1.00455	225	0.00375596	1.00869
1017	0.0238788	1.05652	234	0.00377962	1.00874	226	0.00234185	1.00541
1018	0.0666604	1.1659	235	0.0023566	1.00544	227	0.00452943	1.01048
1019	0.043377	1.10504	236	0.00455796	1.01055	228	0.00384542	1.00889
1020	0.0371194	1.08923	237	0.00386964	1.00895	229	0.00203367	1.00469
1021	0.0105005	1.02447	238	0.00204648	1.00472	230	0.0225818	1.05337
1022	0.0072181	1.01676	239	0.0229502	1.05427	231	0.0102226	1.02382
1023	0.0044728	1.01035	240	0.0103893	1.02421	232	0.00173608	1.00401
1024	0.00384921	1.0089	241	0.0017644	1.00407	233	0.00039104	1.0009
1025	0.00239175	1.00552	242	0.000397418	1.00092	234	0.00113918	1.00263
1026	0.00105403	1.00243	243	0.00115776	1.00267	235	0.00579048	1.01342
1027	0.00357886	1.00827	244	0.00588492	1.01364	236	0.00274135	1.00633
1028	0.00257146	1.00594	245	0.00278606	1.00644	237	0.000664171	1.00153
1029	0.00175221	1.00404	246	0.000675004	1.00156	238	0.0110327	1.02573
1030	0.001159	1.00267	247	0.0147203	1.03448	239	0.00290828	1.00672
1031	0.000128305	1.0003	248	0.00388037	1.00897	240	0.000471649	1.00109
1032	0.00175565	1.00405	249	0.000629296	1.00145	241	0.000306071	1.00071
1033	0.00214726	1.00496	250	0.000408374	1.00094	242	8.43421e-05	1.00019
1034	0.0660901	1.16437	251	0.000112533	1.00026	243	3.81733e-05	1.00009
1035	0.0778215	1.19625	252	5.09326e-05	1.00012	244	2.69523e-05	1.00006
1036	0.0106789	1.02489	253	3.59611e-05	1.00008	245	2.30617e-05	1.00005
1037	0.00995178	1.02318	254	3.077e-05	1.00007	246	1.02017e-05	1.00002
1038	0.00691727	1.01606	255	1.36115e-05	1.00003	247	0.000396857	1.00091
1039	0.0877389	1.22388	256	0.000529505	1.00122	248	0.00153936	1.00355
1040	0.166688	1.46787	257	0.00205388	1.00474	249	0.00053921	1.00124
1041	0.171121	1.48293	258	0.00071944	1.00166	250	0.000271097	1.00062
1042	0.18269	1.52296	259	0.00036171	1.00083	251	6.2862e-05	1.00014
1043	0.186242	1.53547	260	8.38734e-05	1.00019	252	0.00512551	1.01187
1044	0.177596	1.50521	261	0.00563787	1.01307	253	0.00696863	1.01618
1045	0.145989	1.39955	262	0.00718015	1.01667	254	0.00858171	1.01996
1046	0.0318514	1.0761	263	0.00873484	1.02032	255	0.00686286	1.01593
1047	0.205556	1.6053	264	0.00698532	1.01621	256	0.00406889	1.00941
1048	0.194138	1.56365	265	0.0041415	1.00958	257	0.000832218	1.00192
1049	0.206434	1.60855	266	0.000847068	1.00195	258	0.0003106	1.00072
1050	0.197051	1.57417	267	0.000316142	1.00073	259	0.00129934	1.003
1051	0.195242	1.56763	268	0.00132252	1.00305	260	0.000734953	1.00169
1052	0.164279	1.45975	269	0.000748067	1.00172	261	0.000284662	1.00066
1053	0.181521	1.51887	270	0.000289741	1.00067	262	0.00052188	1.0012
1054	0.202679	1.5947	271	0.000531192	1.00122	263	0.000485886	1.00112
1055	0.177879	1.50619	272	0.000494556	1.00114	264	0.000145147	1.00033
1056	0.0736241	1.18474	273	0.000147737	1.00034	265	0.0151859	1.03559
1057	0.0452082	1.10971	274	0.0152916	1.03584	266	0.0281948	1.06707
1058	0.0310137	1.07402	275	0.0282592	1.06723	267	0.00463629	1.01073
1059	0.0260202	1.06175	276	0.00477702	1.01106	268	0.00209107	1.00483
1060	0.00980578	1.02284	277	0.00215454	1.00497	269	0.000756922	1.00174
1061	0.00896128	1.02085	278	0.000779897	1.0018	270	0.000209235	1.00048
1062	0.00620164	1.01438	279	0.000215587	1.0005	271	5.77032e-05	1.00013
1063	0.000793634	1.00183	280	5.94547e-05	1.00014	272	0.00193493	1.00447
1064	0.0254497	1.06035	281	0.00212834	1.00491	273	0.00116345	1.00268
1065	0.011978	1.02796	282	0.00127975	1.00295	274	0.000466484	1.00107
1066	0.00555491	1.01287	283	0.000513115	1.00118	275	0.000240584	1.00055
1067	0.00328005	1.00758	284	0.000264633	1.00061	276	0.000108357	1.00025
1068	0.00277172	1.0064	285	0.000119188	1.00027	277	5.81939e-05	1.00013
1069	0.000102426	1.00024	286	6.40111e-05	1.00015	278	2.52446e-05	1.00006
1070	0.00312184	1.00721	287	2.77681e-05	1.00006	279	0.000114874	1.00026
1071	0.00181067	1.00418	288	0.000126357	1.00029	280	5.38749e-05	1.00012
1072	0.00112626	1.0026	289	5.92603e-05	1.00014	281	8.19626e-05	1.00019
1073	0.00180314	1.00416	290	9.01557e-05	1.00021	282	4.76499e-05	1.00011
1074	0.000318963	1.00073	291	5.24131e-05	1.00012	283	1.2644e-05	1.00003
1075	0.000108565	1.00025	292	1.39079e-05	1.00003	284	1.15163e-05	1.00003
1076	0.209222	1.61891	293	1.26675e-05	1.00003	285	7.49007e-06	1.00002
1077	0.216965	1.64803	294	8.23879e-06	1.00002	286	0.000648156	1.00149
1078	0.00316137	1.00731	295	0.000712947	1.00164	287	0.000293552	1.00068
1079	0.322418	2.10096	296	0.000322896	1.00074	288	6.4663e-05	1.00015
1080	0.343333	2.20462	297	7.11269e-05	1.00016	289	3.71807e-05	1.00009
1081	0.600782	3.98825	298	4.08973e-05	1.00009	290	0.000221121	1.00051
1082	0.578077	3.7851	299	0.000243225	1.00056	291	0.000100511	1.00023
1083	0.600261	3.98347	300	0.000110558	1.00025	292	0.000117131	1.00027
1084	0.573019	3.74127	301	0.00012884	1.0003	293	3.55458e-06	1.00001
1085	0.563516	3.6603	302	3.9099e-06	1.00001	294	0.00111004	1.00256
1086	0.532597	3.40877	303	0.001221	1.00282	295	0.000555901	1.00128
1087	0.54679	3.52201	304	0.00061147	1.00141	296	0.00032784	1.00076
1088	0.50963	3.23318	305	0.000360612	1.00083	297	0.000150633	1.00035
1089	0.531299	3.3986	306	0.00016569	1.00038	298	0.000163714	1.00038
1090	0.348561	2.23131	307	0.000180079	1.00041	299	2.86178e-05	1.00007
1091	0.547073	3.5243	308	3.14785e-05	1.00007	300	0.000404971	1.00093
1092	0.527621	3.36993	309	0.000445453	1.00103	301	0.000284584	1.00066
1093	0.613246	4.10436	310	0.000313031	1.00072	302	7.45139e-05	1.00017
1094	0.656623	4.53548	311	8.19625e-05	1.00019	303	0.000204402	1.00047
1095	0.64445	4.41012	312	0.000224835	1.00052	304	7.71012e-05	1.00018
1096	0.657182	4.54132	313	8.48083e-05	1.0002	305	4.63574e-05	1.00011
1097	0.652774	4.49546	314	5.09914e-05	1.00012	306	2.62678e-05	1.00006
1098	0.652714	4.49484	315	2.88936e-05	1.00007	307	1.39737e-05	1.00003
1099	0.653947	4.50762	316	1.53706e-05	1.00004	308	6.87072e-05	1.00016
1100	0.669164	4.66836	317	7.55753e-05	1.00017	309	0.000826891	1.00191
1101	0.65613	4.53033	318	0.000909548	1.0021
1102	0.652112	4.48861	319	0.127063	1.33987
1103	0.60622	4.0385	320	0.176504	1.50143
1104	0.311497	2.04879	321	0.278101	1.89715
1105	0.308691	2.03559	322	0.276671	1.89091
1106	0.0892272	1.22808	323	0.273517	1.87723
1107	0.0292105	1.06957	324	0.299683	1.99381
1108	0.0120069	1.02803	325	0.286777	1.93543
1109	0.00715809	1.01662
1110	0.000547083	1.00126
1111	0.00348714	1.00806
1112	0.0029928	1.00691
1113	0.001385	1.00319
1114	0.0198022	1.04665
1115	0.0184731	1.04345
1116	0.0209197	1.04935
1117	0.0310575	1.07413
1118	0.00490714	1.01136
1119	0.0015541	1.00358
1120	0.00420356	1.00973
1121	0.00420949	1.00974
1122	0.00358386	1.00829
1123	0.0499793	1.12197
1124	0.0504202	1.1231
1125	0.0224682	1.0531
1126	0.0293216	1.06985
1127	0.015281	1.03581
1128	0.00992251	1.02311
1129	0.00706949	1.01641
1130	0.00580158	1.01345
1131	0.000203311	1.00047
1132	0.00104185	1.0024
1133	0.000419847	1.00097
1134	0.354953	2.2644
1135	0.585792	3.85294
1136	0.653256	4.50045
1137	0.686477	4.85822
1138	0.353418	2.25641
1139	0.355034	2.26482
1140	0.318096	2.08016
1141	0.342482	2.2003
1142	0.416687	2.61028
1143	0.529442	3.38409
1144	0.406291	2.54854
1145	0.341645	2.19606
1146	0.539976	3.46718
1147	0.424511	2.65773
1148	0.428476	2.68211
1149	0.468612	2.94179
1150	0.429377	2.68767
1151	0.439073	2.74835
1152	0.422262	2.644
1153	0.43734	2.73741
1154	0.443366	2.77566
1155	0.455609	2.85502
1156	0.500183	3.16361
1157	0.503825	3.19025
1158	0.53613	3.4366
1159	0.452107	2.83209
1160	0.438375	2.74394
1161	0.455893	2.85689
1162	0.565382	3.67606
1163	0.704326	5.06204
1164	0.71363	5.17166
1165	0.745846	5.56988
1166	0.739574	5.49002
1167	0.855504	7.16974
1168	0.686073	4.8537
1169	0.429088	2.68589
1170	0.428782	2.68399
1171	0.461019	2.89081
1172	0.388794	2.4479
1173	0.396218	2.49011
1174	0.382541	2.41291
1175	0.394865	2.48236
1176	0.341281	2.19422
1177	0.387479	2.4405
1178	0.43064	2.6955
1179	0.209408	1.6196
1180	0.206955	1.61048
1181	0.218011	1.652
1182	0.296894	1.98104
1183	0.202237	1.59308
1184	0.200205	1.58564
1185	0.237629	1.72834
1186	0.334621	2.16083
1187	0.343116	2.20351
1188	0.341943	2.19757
1189	0.331536	2.14553
1190	0.364839	2.31654
1191	0.390449	2.45725
1192	0.362146	2.30222
1193	0.315433	2.06744
1194	0.205111	1.60365
1195	0.20241	1.59371
1196	0.0862577	1.21971
1197	0.418943	2.62387
1198	0.445076	2.78661
1199	0.454325	2.84659
1200	0.493875	3.11799
1201	0.389861	2.45392
1202	0.379304	2.39499
1203	0.336117	2.16829
1204	0.285291	1.92882
1205	0.245772	1.76105
1206	0.38948	2.45177
1207	0.402551	2.52668
1208	0.465688	2.92205
1209	0.380909	2.40386
1210	0.359955	2.29063
1211	0.373097	2.36101
1212	0.305817	2.02217
1213	0.321313	2.09562
1214	0.359399	2.2877
1215	0.370372	2.34624
1216	0.433616	2.71404
1217	0.412779	2.5869
1218	0.397164	2.49554
1219	0.356332	2.2716
1220	0.327538	2.12587
1221	0.31898	2.0844
1222	0.365231	2.31863
1223	0.377615	2.3857
1224	0.412407	2.58468
1225	0.349965	2.23854
1226	0.38801	2.44348
1227	0.395336	2.48505
1228	0.39745	2.49718
1229	0.400767	2.51633
1230	0.399819	2.51084
1231	0.4125	2.58524
1232	0.41715	2.61307
1233	0.409721	2.56875
1234	0.429223	2.68672
1235	0.397753	2.49892
1236	0.383055	2.41577
1237	0.287724	1.93965
1238	0.271414	1.86816
1239	0.253416	1.79232
1240	0.28724	1.93749
1241	0.378438	2.39022
1242	0.35396	2.25923
1243	0.491256	3.09925
1244	0.512895	3.25758
1245	0.429244	2.68685
1246	0.416077	2.60662
1247	0.369587	2.342
1248	0.368884	2.33821
1249	0.363608	2.30998
1250	0.377934	2.38745
1251	0.174142	1.49328
1252	0.0594642	1.14674
1253	0.00180307	1.00416
1254	0.00125565	1.0029
1255	0.000760973	1.00175
1256	0.0414417	1.10012
1257	0.000315776	1.00073
1258	0.00775	1.01801
1259	0.00515455	1.01194
1260	0.00178599	1.00412
1261	0.00269839	1.00623
1262	0.174141	1.49328
1263	0.0130621	1.03053
1264	0.000736103	1.0017
1265	0.171763	1.48513
1266	0.36775	2.33211
1267	0.342892	2.20238
1268	0.310958	2.04625
1269	0.484297	3.04998
1270	0.482169	3.03507
1271	0.443063	2.77372
1272	0.57236	3.7356
1273	0.470172	2.95238
1274	0.721803	5.2699
1275	0.698106	4.99006
1276	0.118791	1.31459
1277	0.0767285	1.19324
1278	0.00505592	1.01171
1279	0.00977582	1.02276
1280	0.00891735	1.02075
1281	0.00422958	1.00979
1282	0.00717836	1.01667
1283	0.00654253	1.01518
1284	0.00277579	1.00641
1285	0.00151672	1.0035
1286	0.00697253	1.01618
1287	0.00597967	1.01386
1288	0.00287382	1.00664
1289	0.00910274	1.02118
1290	0.00538486	1.01248
1291	0.00267757	1.00618
1292	0.000786788	1.00181
1293	0.00145618	1.00336
1294	0.0219885	1.05193
1295	0.0117743	1.02748
1296	0.0097786	1.02277
1297	0.00896743	1.02086
1298	0.00366258	1.00847
1299	0.00114401	1.00264
1300	0.000945203	1.00218
1301	0.000121679	1.00028
1302	0.00923285	1.02149
1303	0.0105529	1.0246
1304	0.0177308	1.04167
1305	0.0201404	1.04747
1306	0.015283	1.03582
1307	0.0312467	1.0746
1308	0.0617522	1.1528
1309	0.00268085	1.00619
1310	0.00171086	1.00395
1311	0.00315255	1.00729
1312	0.000845806	1.00195
1313	0.000504077	1.00116
1314	0.000626465	1.00144
1315	0.000577687	1.00133
1316	0.000424121	1.00098
1317	0.000105438	1.00024
1318	5.94035e-05	1.00014
1319	2.84239e-05	1.00007
1320	0.0983749	1.25422
1321	0.0964101	1.24856
1322	0.0666667	1.16591
1323	0.0154827	1.03629
1324	0.0711746	1.17808
1325	0.0801624	1.20271
1326	0.0321214	1.07677
1327	0.0577143	1.14213
1328	0.0669525	1.16668
1329	0.0361595	1.08682
1330	0.0321394	1.07681
1331	0.0351932	1.08441
1332	0.0373637	1.08984
1333	0.0383368	1.09229
1334	0.0222413	1.05255
1335	0.0118264	1.02761
1336	0.00695759	1.01615
1337	0.00431808	1.00999
1338	0.00161346	1.00372
1339	0.000655831	1.00151
1340	0.000536656	1.00124
1341	0.0191076	1.04498
1342	0.0212231	1.05008
1343	0.037881	1.09114
1344	0.0914076	1.23426
1345	0.0784736	1.19805
1346	0.0717621	1.17967
1347	0.160825	1.44819
1348	0.203568	1.59797
1349	0.0514696	1.12582
1350	0.0248618	1.05892
1351	0.0215907	1.05097
1352	0.0177562	1.04173
1353	0.0106571	1.02484
1354	0.165955	1.46539
1355	0.269034	1.85795
1356	0.261507	1.82602
1357	0.0532596	1.13047
1358	0.0732891	1.18383
1359	0.0220248	1.05202
1360	0.0509317	1.12443
1361	0.0504317	1.12313
1362	0.137203	1.37152
1363	0.0471939	1.11479
1364	0.0175427	1.04122
1365	0.0129299	1.03022
1366	0.007601	1.01766
1367	0.00289082	1.00668
1368	0.00174587	1.00403
1369	0.014169	1.03316
1370	0.00259041	1.00598
1371	0.00148481	1.00342
1372	0.00138949	1.0032
1373	0.00601155	1.01394
1374	0.00175165	1.00404
1375	0.000439356	1.00101
1376	0.0385819	1.0929
1377	0.0296554	1.07067
1378	0.00857798	1.01995
1379	0.00678068	1.01574
1380	0.00177505	1.0041
1381	0.000890258	1.00205
1382	0.00231366	1.00534
1383	0.00171091	1.00395
1384	0.000996671	1.0023
1385	0.0275081	1.06539
1386	0.0370448	1.08904
1387	0.0421555	1.10193
1388	0.0377947	1.09092
1389	0.0327023	1.07821
1390	0.00216167	1.00499
1391	0.0498437	1.12161
1392	0.0359731	1.08636
1393	0.0245476	1.05815
1394	0.0056537	1.0131
1395	0.00361807	1.00837
1396	0.0244698	1.05796
1397	0.00072177	1.00166
1398	0.0257059	1.06098
1399	0.0421972	1.10204
1400	0.0657026	1.16333
1401	0.0858899	1.21868
1402	0.0111846	1.02609
1403	0.0106881	1.02492
1404	0.017526	1.04118
1405	0.0259004	1.06145
1406	0.0203546	1.04798
1407	0.0186813	1.04395
1408	0.0126271	1.0295
1409	0.00405888	1.00939
1410	0.00270887	1.00626
1411	0.00209002	1.00482
1412	0.0010697	1.00247
1413	0.000408302	1.00094
1414	0.000400373	1.00092
1415	0.00121229	1.0028
1416	0.000758089	1.00175
1417	0.000222091	1.00051
1418	0.00108744	1.00251
1419	0.024692	1.0585
1420	0.0400135	1.09651
1421	0.0347481	1.0833
1422	0.0437643	1.10602
1423	0.0579246	1.14268
1424	0.0151474	1.03549
1425	0.0415051	1.10028
1426	0.0435352	1.10544
1427	0.00868742	1.0202
1428	0.000789415	1.00182
1429	0.0601574	1.14857
1430	0.0621254	1.15379
1431	0.0964975	1.24881
1432	0.0998556	1.25851
1433	0.0978861	1.25281
1434	0.11002	1.28831
1435	0.0617144	1.1527
1436	0.0741976	1.18631
1437	0.0442986	1.10738
1438	0.0436322	1.10569
1439	0.0218486	1.0516
1440	0.0145024	1.03396
1441	0.000810516	1.00187
1442	0.0166705	1.03913
1443	0.0181041	1.04257
1444	0.0247362	1.05861
1445	0.00817987	1.01901
1446	0.00443264	1.01026
1447	0.00172537	1.00398
1448	0.000769875	1.00177
1449	0.000143222	1.00033
1450	0.281435	1.91177
1451	0.232963	1.70987
1452	0.218834	1.65514
1453	0.128788	1.3452
1454	0.0864064	1.22013
1455	0.112401	1.29539
1456	0.144016	1.39321
1457	0.0712748	1.17835
1458	0.0753635	1.1895
1459	0.108263	1.28311
1460	0.158244	1.43961
1461	0.107552	1.28101
1462	0.104955	1.27337
1463	0.0931233	1.23915
1464	0.0362342	1.08701
1465	0.105117	1.27385
1466	0.10314	1.26806
1467	0.025886	1.06142
1468	0.0208195	1.04911
1469	0.00524156	1.01214
1470	0.116476	1.3076
1471	0.12944	1.34722
1472	0.299471	1.99283
1473	0.0910961	1.23338
1474	0.0391714	1.09439
1475	0.0355293	1.08525
1476	0.0296386	1.07063
1477	0.0781992	1.19729
1478	0.0769367	1.19381
1479	0.0430683	1.10425
1480	0.0146485	1.0343
1481	0.130258	1.34976
1482	0.123646	1.32937
1483	0.0300816	1.07172
1484	0.230331	1.69954
1485	0.319935	2.08898
1486	0.272625	1.87338
1487	0.311776	2.0501
1488	0.193366	1.56087
1489	0.0101878	1.02374
1490	0.0674421	1.168
1491	0.0496666	1.12116
1492	0.0416065	1.10054
1493	0.0264619	1.06283
1494	0.033534	1.08027
1495	0.0156284	1.03664
1496	0.00531212	1.01231
1497	0.00144144	1.00332
1498	0.0598932	1.14787
1499	0.0833075	1.21146
1500	0.171647	1.48473
1501	0.187298	1.53921
1502	0.18969	1.54771
1503	0.253424	1.79235
1504	0.29219	1.9597
1505	0.299393	1.99247
1506	0.300225	1.9963
1507	0.268362	1.85508
1508	0.299148	1.99135
1509	0.300032	1.99541
1510	0.256492	1.80506
1511	0.281945	1.91401
1512	0.288741	1.9442
1513	0.27174	1.86956
1514	0.281881	1.91373
1515	0.288659	1.94383
1516	0.26076	1.82289
1517	0.0751603	1.18894
1518	0.068287	1.17027
1519	0.00278645	1.00644
1520	0.00200469	1.00463
1521	0.00384688	1.0089
1522	0.00239854	1.00554
1523	0.00463907	1.01074
1524	0.0039385	1.00911
1525	0.00208289	1.00481
1526	0.0239973	1.05681
1527	0.0108633	1.02533
1528	0.00184491	1.00426
1529	0.000415551	1.00096
1530	0.00121059	1.00279
1531	0.00615344	1.01427
1532	0.00291319	1.00673
1533	0.000705803	1.00163
1534	0.0252043	1.05975
1535	0.00664403	1.01542
1536	0.00107749	1.00248
1537	0.000699224	1.00161
1538	0.000192681	1.00044
1539	8.72075e-05	1.0002
1540	6.15731e-05	1.00014
1541	5.26849e-05	1.00012
1542	2.33059e-05	1.00005
1543	0.000906626	1.00209
1544	0.00351668	1.00813
1545	0.00123183	1.00284
1546	0.000619326	1.00143
1547	0.000143609	1.00033
1548	0.0070945	1.01647
1549	0.00778151	1.01808
1550	0.00917019	1.02134
1551	0.00733348	1.01703
1552	0.00434791	1.01006
1553	0.000889286	1.00205
1554	0.000331899	1.00076
1555	0.00138844	1.0032
1556	0.000785351	1.00181
1557	0.000304182	1.0007
1558	0.000557667	1.00128
1559	0.000519205	1.0012
1560	0.0001551	1.00036
1561	0.015592	1.03655
1562	0.0284421	1.06768
1563	0.00517711	1.01199
1564	0.00233499	1.00539
1565	0.000845216	1.00195
1566	0.000233643	1.00054
1567	6.44343e-05	1.00015
1568	0.00267824	1.00619
1569	0.0016104	1.00371
1570	0.000645686	1.00149
1571	0.000333006	1.00077
1572	0.000149982	1.00035
1573	8.05494e-05	1.00019
1574	3.49425e-05	1.00008
1575	0.000159003	1.00037
1576	7.45712e-05	1.00017
1577	0.000113449	1.00026
1578	6.59548e-05	1.00015
1579	1.75013e-05	1.00004
1580	1.59403e-05	1.00004
1581	1.03674e-05	1.00002
1582	0.000897148	1.00207
1583	0.000406322	1.00094
1584	8.95036e-05	1.00021
1585	5.14638e-05	1.00012
1586	0.000306066	1.0007
1587	0.000139122	1.00032
1588	0.000162128	1.00037
1589	4.92008e-06	1.00001
1590	0.00153646	1.00354
1591	0.000769453	1.00177
1592	0.000453782	1.00105
1593	0.000208499	1.00048
1594	0.000226606	1.00052
1595	3.96115e-05	1.00009
1596	0.000560543	1.00129
1597	0.000393908	1.00091
1598	0.000103139	1.00024
1599	0.000282924	1.00065
1600	0.00010672	1.00025
1601	6.41658e-05	1.00015
1602	3.63587e-05	1.00008
1603	1.93418e-05	1.00004
1604	9.51014e-05	1.00022
1605	0.00114454	1.00264
1606	0.216988	1.64812
1607	0.239595	1.73618
1608	0.282575	1.91679
1609	0.279226	1.90207
1610	0.275506	1.88584
1611	0.300593	1.99799
1612	0.289559	1.94786
1613	0.329806	2.13701
1614	0.468386	2.94026
1615	0.666986	4.645
1616	0.583945	3.83659
1617	0.586706	3.86106
1618	0.473455	2.97478
1619	0.479627	3.01736
1620	0.348805	2.23257
1621	0.323285	2.10516
1622	0.359529	2.28838
1623	0.372024	2.35518
1624	0.432372	2.70628
1625	0.373823	2.36496
1626	0.464411	2.91348
1627	0.45604	2.85786
1628	0.524208	3.34355
1629	0.602358	4.00275
1630	0.502853	3.18312
1631	0.514177	3.26721
1632	0.350467	2.24113
1633	0.358071	2.28072
1634	0.410774	2.57498
1635	0.563388	3.65922
1636	0.579402	3.79666
1637	0.567964	3.69797
1638	0.578334	3.78734
1639	0.586053	3.85525
1640	0.689417	4.89122
1641	0.581117	3.81168
1642	0.401507	2.52062
1643	0.390767	2.45905
1644	0.102992	1.26763
1645	0.414226	2.59553
1646	0.428962	2.68511
1647	0.43074	2.69613
1648	0.479654	3.01755
1649	0.413347	2.59028
1650	0.356355	2.27172
1651	0.355472	2.26711
1652	0.358756	2.28431
1653	0.342105	2.19839
1654	0.455298	2.85298
1655	0.446856	2.79805
1656	0.485028	3.05512
1657	0.36147	2.29864
1658	0.5532	3.57437
1659	0.662064	4.59266
1660	0.680216	4.78869
1661	0.692678	4.92809
1662	0.694375	4.94737
1663	0.695997	4.96589
1664	0.693166	4.93362
1665	0.682153	4.81009
1666	0.692058	4.92105
1667	0.692198	4.92264
1668	0.687945	4.87467
1669	0.702668	5.04276
1670	0.76726	5.8514
1671	0.630854	4.27419
1672	0.634296	4.3082
1673	0.624767	4.21471
1674	0.624242	4.20961
1675	0.604067	4.01853
1676	0.575065	3.75894
1677	0.84958	7.07262
1678	0.41504	2.6004
1679	0.517615	3.29318
1680	0.545541	3.51189
1681	0.510451	3.2393
1682	0.507326	3.21607
1683	0.49822	3.14934
1684	0.448246	2.80702
1685	0.46947	2.94761
1686	0.505262	3.20083
1687	0.35329	2.25574
1688	0.531178	3.39764
1689	0.271203	1.86725
1690	0.278665	1.89961
1691	0.133899	1.36113
1692	0.0138518	1.03241
1693	0.355695	2.26827
1694	0.349822	2.2378
1695	0.199054	1.58145
1696	0.209203	1.61884
1697	0.24851	1.77219
1698	0.309762	2.04062
1699	0.357409	2.27724
1700	0.408337	2.56057
1701	0.425213	2.66203
1702	0.515594	3.27789
1703	0.488248	3.07785
1704	0.513001	3.25837
1705	0.312457	2.05332
1706	0.279933	1.90516
1707	0.0196512	1.04629
1708	0.294995	1.9724
1709	0.300076	1.99561
1710	0.344423	2.21016
1711	0.359448	2.28796
1712	0.390662	2.45845
1713	0.349984	2.23864
1714	0.386312	2.43395
1715	0.339397	2.18473
1716	0.306868	2.02707
1717	0.321298	2.09555
1718	0.282629	1.91703
1719	0.268969	1.85767
1720	0.209358	1.61941
1721	0.110084	1.2885
1722	0.391563	2.46356
1723	0.396539	2.49195
1724	0.369552	2.34181
1725	0.250453	1.78014
1726	0.270757	1.86534
1727	0.392524	2.46901
1728	0.394816	2.48208
1729	0.400139	2.51269
1730	0.423729	2.65295
1731	0.45899	2.87733
1732	0.520292	3.31354
1733	0.377262	2.38376
1734	0.449533	2.81535
1735	0.547386	3.52684
1736	0.503854	3.19047
1737	0.433243	2.71171
1738	0.41876	2.62277
1739	0.432024	2.70411
1740	0.436175	2.73008
1741	0.444258	2.78137
1742	0.373747	2.36454
1743	0.562641	3.65293
1744	0.588471	3.87678
1745	0.615289	4.12372
1746	0.672277	4.70194
1747	0.51966	3.30872
1748	0.551658	3.56171
1749	0.587742	3.87028
1750	0.597569	3.95885
1751	0.651811	4.4855
1752	0.658934	4.55968
1753	0.644556	4.4112
1754	0.657334	4.54291
1755	0.595903	3.94369
1756	0.554782	3.58742
1757	0.507854	3.21999
1758	0.374169	2.36684
1759	0.434904	2.7221
1760	0.588371	3.87588
1761	0.589856	3.88917
1762	0.647223	4.43836
1763	0.663111	4.60374
1764	0.722955	5.2839
1765	0.434658	2.72056
1766	0.377878	2.38714
1767	0.255005	1.79889
1768	0.463874	2.90987
1769	0.482172	3.03509
1770	0.480753	3.0252
1771	0.476243	2.99394
1772	0.488407	3.07898
1773	0.583916	3.83633
1774	0.593449	3.92147
1775	0.58947	3.88571
1776	0.609451	4.06866
1777	0.595237	3.93765
1778	0.596248	3.94683
1779	0.571521	3.72839
1780	0.630358	4.26931
1781	0.629849	4.26431
1782	0.66217	4.59377
1783	0.69215	4.9221
1784	0.422295	2.6442
1785	0.421842	2.64145
1786	0.480784	3.02541
1787	0.550688	3.55376
1788	0.598889	3.9709
1789	0.738657	5.47845
1790	0.768126	5.86308
1791	0.780513	6.03272
1792	0.730676	5.37869
1793	0.551445	3.55996
1794	0.49616	3.13444
1795	0.455227	2.85251
1796	0.453739	2.84275
1797	0.439488	2.75098
1798	0.361809	2.30043
1799	0.337121	2.17331
1800	0.316112	2.07067
1801	0.448551	2.809
1802	0.462308	2.8994
1803	0.51457	3.27017
1804	0.529678	3.38593
1805	0.472424	2.96773
1806	0.420583	2.6338
1807	0.486052	3.06233
1808	0.556702	3.60331
1809	0.574953	3.75797
1810	0.591784	3.90646
1811	0.655717	4.52603
1812	0.694953	4.95396
1813	0.81699	6.56129
1814	0.646162	4.42754
1815	0.598829	3.97035
1816	0.603735	4.01546
1817	0.521588	3.32344
1818	0.653424	4.50219
1819	0.661257	4.58413
1820	0.680984	4.79716
1821	0.654192	4.51016
1822	0.720428	5.25325
1823	0.538122	3.45241
1824	0.569916	3.71463
1825	0.522831	3.33297
1826	0.633648	4.30178
1827	0.645738	4.42322
1828	0.564903	3.672
1829	0.583263	3.83056
1830	0.659409	4.56467
1831	0.652412	4.49171
1832	0.583374	3.83154
1833	0.671024	4.6884
1834	0.662974	4.60229
1835	0.662758	4.6
1836	0.651652	4.48386
1837	0.704031	5.05861
1838	0.662247	4.59459
1839	0.66615	4.63607
1840	0.669468	4.67163
1841	0.678201	4.76652
1842	0.685346	4.84558
1843	0.6553	4.52168
1844	0.639074	4.35587
1845	0.630446	4.27017
1846	0.691268	4.9121
1847	0.542305	3.48582
1848	0.65689	4.53827
1849	0.671191	4.6902
1850	0.646583	4.43183
1851	0.640009	4.36525
1852	0.628327	4.2494
1853	0.607248	4.04807
1854	0.721484	5.26604
1855	0.74187	5.51913
1856	0.733236	5.41049
1857	0.733335	5.41172
1858	0.908433	8.09903
1859	0.747482	5.59091
1860	0.5635	3.66016
1861	0.503843	3.19038
1862	0.481088	3.02752
1863	0.480929	3.02642
1864	0.457155	2.8652
1865	0.398035	2.50055
1866	0.495592	3.13035
1867	0.491064	3.09788
1868	0.491882	3.10371
1869	0.490801	3.096
1870	0.492927	3.11119
1871	0.566801	3.68809
1872	0.472399	2.96756
1873	0.388069	2.44382
1874	0.478566	3.01
1875	0.453027	2.83809
1876	0.453229	2.83942
1877	0.469175	2.94561
1878	0.600096	3.98195
1879	0.630479	4.27051
1880	0.476878	2.99832
1881	0.561532	3.64361
1882	0.482564	3.03783
1883	0.616366	4.13395
1884	0.628913	4.25513
1885	0.627867	4.2449
1886	0.648312	4.44951
1887	0.461355	2.89304
1888	0.419451	2.62694
1889	0.431247	2.69928
1890	0.447372	2.80138
1891	0.292935	1.96307

## Sheet: S3.4.Internal Primate Nodes
Table 6. Predicted Values at Various Primate Last Common Ancestors.
Lineage	Node Number	Geological Age	Predicted Litter Size Value
LCA of Strepsirrhini	1453	~66.3 Ma [1]	1.4
LCA of Haplorhini	1488	~70.0 Ma [1]	1.6
LCA of Simiiformes	1490	~46.72 Ma [1]	1.2
LCA of Catarrhini	1534	~32.1 Ma [1]	1.1
LCA of Platyrrhini	1491	~20.9 Ma [1]	1.1
LCA of Hominoidea	1535	~22.32 Ma [1]	1
LCA of Ceboidea	1499	~16.55 Ma [1]	1.2
LCA of Callitrichidae	1500	~14 Ma [2]	1.5
1	Pozzi, L.; Hodgson, J.A.; Burrell, A.S.; Sterner, K.N.; Raaum, R.L.; Disotell, T.R. Primate Phylogenetic Relationships and Divergence Dates Inferred from Complete Mitochondrial Genomes. Mol. Phylogenet. Evol. 2014, 75, 165–183, doi:10.1016/j.ympev.2014.02.023.
2	Buckner, J.C.; Lynch Alfaro, J.W.; Rylands, A.B.; Alfaro, M.E. Biogeography of the Marmosets and Tamarins (Callitrichidae). Mol. Phylogenet. Evol. 2015, 82, 413–425, doi:10.1016/j.ympev.2014.04.031.
Ancestral Primate Bolded in "Node Values"
Ancestral Strepsirrhine and Haplorrhine Underlined in "Node Values"
