# Supplementary material for: The Evolution of Primate Litter Size
Source: MDPI journal article supplement (doi:10.3390/humans4030014), 2024-07-19
Supplement: s1 [file s1]

**Phylogenetic Signal Results, Primate Dataset (N=155)**

| <b>Character</b> | <b>Pagel's lambda</b> | <b>p-value</b>     | <b>Blomberg's <i>K</i></b> | <b>p-value</b> | <b>Sample size</b> |
|------------------|-----------------------|--------------------|----------------------------|----------------|--------------------|
| LogLS            | 0.999934              | <b>6.24112e-58</b> | 0.631085                   | <b>0.001</b>   | 155                |
| LS               | 0.999934              | <b>3.48079e-57</b> | 0.617439                   | <b>0.001</b>   | 155                |
| LogG             | 0.985178              | <b>1.42447e-43</b> | 0.598141                   | <b>0.001</b>   | 120                |
| LogAW            | 0.977919              | <b>1.30482e-55</b> | 0.789695                   | <b>0.001</b>   | 151                |
| LogBrain         | 0.989482              | <b>9.94717e-65</b> | 1.47352                    | <b>0.001</b>   | 137                |
| Brain            | 0.999934              | <b>3.98275e-21</b> | 0.244817                   | 0.004          | 137                |
| LogML            | 0.948994              | <b>1.806e-24</b>   | 0.197976                   | <b>0.001</b>   | 124                |
| ML               | 0.928062              | <b>2.92926e-19</b> | 0.191741                   | <b>0.001</b>   | 124                |
| LogPGR           | 0.989534              | <b>1.81521e-45</b> | 1.39111                    | <b>0.001</b>   | 97                 |
| LogBBR           | 0.894619              | <b>3.85095e-17</b> | 0.15802                    | <b>0.001</b>   | 137                |
| BBR              | 0.879276              | <b>6.26946e-17</b> | 0.144077                   | <b>0.001</b>   | 137                |
| EQ               | 0.779806              | <b>1.1794e-14</b>  | 0.163693                   | <b>0.001</b>   | 137                |
| PEQ              | 0.798959              | <b>1.84771e-16</b> | 0.197265                   | <b>0.001</b>   | 137                |
| PGN              | 0.158834              | 0.400855           | 0.0802558                  | 0.465          | 34                 |
| LogNBrain        | 0.999934              | <b>3.12757e-15</b> | 2.19325                    | <b>0.001</b>   | 34                 |

**LogLS (N=155)****Phylogenetic signal lambda** : 0.999934

logL(lambda) : 247.283

LR(lambda=0) : 257.428

P-value (based on LR test) : 6.24112e-58

**Phylogenetic signal K** : 0.631085

P-value (based on 1000 randomizations) : 0.001

**LS (N=155)****Phylogenetic signal lambda** : 0.999934

logL(lambda) : 58.4921

LR(lambda=0) : 254.003

P-value (based on LR test) : 3.48079e-57

**Phylogenetic signal K** : 0.617439

P-value (based on 1000 randomizations) : 0.001

**LogG (n=120)****Phylogenetic signal lambda** : 0.985178

logL(lambda) : 185.005

LR(lambda=0) : 191.597

P-value (based on LR test) : 1.42447e-43  
**Phylogenetic signal K** : 0.598141  
P-value (based on 1000 randomizations) : 0.001

#### **LogAW (n=151)**

**Phylogenetic signal lambda** : 0.977919  
logL(lambda) : -19.9902  
LR(lambda=0) : 246.784  
P-value (based on LR test) : 1.30482e-55  
**Phylogenetic signal K** : 0.789695  
P-value (based on 1000 randomizations) : 0.001

#### **LogBrain (n=137)**

**Phylogenetic signal lambda** : 0.989482  
logL(lambda) : 42.264  
LR(lambda=0) : 288.618  
P-value (based on LR test) : 9.94717e-65  
**Phylogenetic signal K** : 1.47352  
P-value (based on 1000 randomizations) : 0.001

#### **Brain (n=137)**

**Phylogenetic signal lambda** : 0.999934  
logL(lambda) : -807.2  
LR(lambda=0) : 88.9827  
P-value (based on LR test) : 3.98275e-21  
**Phylogenetic signal K** : 0.244817  
P-value (based on 1000 randomizations) : 0.004

#### **LogML (n=124)**

**Phylogenetic signal lambda** : 0.948994  
logL(lambda) : 105.384  
LR(lambda=0) : 104.225  
P-value (based on LR test) : 1.806e-24  
**Phylogenetic signal K** : 0.197976  
P-value (based on 1000 randomizations) : 0.001

#### **ML (n=124)**

**Phylogenetic signal lambda** : 0.928062  
logL(lambda) : -456.787  
LR(lambda=0) : 80.485  
P-value (based on LR test) : 2.92926e-19  
**Phylogenetic signal K** : 0.191741  
P-value (based on 1000 randomizations) : 0.001

**LogPGR (n=97)****Phylogenetic signal lambda** : 0.989534

logL(lambda) : 23.1679

LR(lambda=0) : 200.279

P-value (based on LR test) : 1.81521e-45

**Phylogenetic signal K** : 1.39111

P-value (based on 1000 randomizations) : 0.001

**LogBBR (n=137)****Phylogenetic signal lambda** : 0.894619

logL(lambda) : 63.6599

LR(lambda=0) : 70.8518

P-value (based on LR test) : 3.85095e-17

**Phylogenetic signal K** : 0.15802

P-value (based on 1000 randomizations) : 0.001

**BBR (n=137)****Phylogenetic signal lambda** : 0.879276

logL(lambda) : 509.951

LR(lambda=0) : 69.8903

P-value (based on LR test) : 6.26946e-17

**Phylogenetic signal K** : 0.144077

P-value (based on 1000 randomizations) : 0.001

**EQ (n=137)****Phylogenetic signal lambda** : 0.779806

logL(lambda) : -129.232

LR(lambda=0) : 59.5713

P-value (based on LR test) : 1.1794e-14

**Phylogenetic signal K** : 0.163693

P-value (based on 1000 randomizations) : 0.001

**PEQ (n=137)****Phylogenetic signal lambda** : 0.798959

logL(lambda) : 1.27518

LR(lambda=0) : 67.7588

P-value (based on LR test) : 1.84771e-16

**Phylogenetic signal K** : 0.197265

P-value (based on 1000 randomizations) : 0.001

**PGN (n=34)****Phylogenetic signal lambda** : 0.158834

logL(lambda) : 18.9616

LR(lambda=0) : 0.705759

P-value (based on LR test) : 0.400855

**Phylogenetic signal K** : 0.0802558

P-value (based on 1000 randomizations) : 0.465

**LogNBrain (n=34)****Phylogenetic signal lambda** : 0.999934

logL(lambda) : -0.766742

LR(lambda=0) : 62.1844

P-value (based on LR test) : 3.12757e-15

**Phylogenetic signal K** : 2.19325

P-value (based on 1000 randomizations) : 0.001
