# Supplementary material for: The Evolution of Primate Litter Size
Source: MDPI journal article supplement (doi:10.3390/humans4030014), 2024-07-19
Supplement: s1 [file s1]

**Phylogenetic Generalized Least Square (PGLS) Analyses, Primate Dataset (N=155)**

| <b>Call</b>      | <b>Lambda</b> | <b>Intercept</b> | <b>Slope</b> | <b>Adjusted R-squared</b> | <b>p-value</b>      | <b>Sample size</b> |
|------------------|---------------|------------------|--------------|---------------------------|---------------------|--------------------|
| LogLS ~ LogG     | 1.000         | 0.846825         | -0.367564    | 0.1107                    | <b>0.0001214</b>    | 120                |
| LogLS ~ LogML    | 1.000         | 0.121217         | -0.042479    | 0.002752                  | 0.2494              | 124                |
| LogLS ~ ML       | 1.000         | 0.06903496       | -0.00031158  | -0.003912                 | 0.4719              | 124                |
| LS ~ ML          | 1.000         | 1.2244236        | -0.0011492   | -0.003044                 | 0.4301              | 124                |
| LogLS ~ LogAW    | 1.000         | 0.074201         | -0.011529    | -0.00219                  | 0.4136              | 151                |
| LogLS ~ LogBrain | 1.000         | 0.093679         | -0.044213    | 0.01739                   | 0.06711             | 137                |
| LogLS ~ LogPGR   | 1.000         | 0.033493         | -0.061376    | 0.02589                   | 0.06254             | 97                 |
| LogLS ~ LogBBR   | 1.000         | 0.0036346        | -0.0205511   | -0.00217                  | 0.4024              | 137                |
| LogLS ~ BBR      | 1.000         | 0.047953         | -0.418883    | -0.003785                 | 0.4864              | 137                |
| LogLS ~ EQ       | 1.000         | 0.0493281        | -0.0062038   | 0.0003352                 | 0.3084              | 137                |
| LogAW ~ LogBrain | 0.845         | 1.531256         | 1.189017     | 0.753                     | <b>&lt; 2.2e-16</b> | 137                |
| LogBrain ~ LogAW | 0.914         | -0.591126        | 0.607373     | 0.7107                    | <b>&lt; 2.2e-16</b> | 137                |
| LogAW ~ LogML    | 0.955         | 2.25039          | 0.70252      | 0.05537                   | <b>0.00491</b>      | 124                |
| LogAW ~ LogG     | 0.953         | -0.96464         | 1.80601      | 0.08875                   | <b>0.0005576</b>    | 120                |
| LogAW ~ LogPGR   | 0.660         | 3.405221         | 1.271542     | 0.632                     | <b>&lt; 2.2e-16</b> | 97                 |
| LogAW ~ LogBBR   | 0.988         | 0.975840         | -1.137380    | 0.5206                    | <b>&lt; 2.2e-16</b> | 137                |
| LogAW ~ EQ       | 0.991         | 3.128052         | -0.097092    | 0.06102                   | <b>0.002098</b>     | 137                |
| LogG ~ LogBrain  | 0.966         | 2.037712         | 0.121734     | 0.1931                    | <b>1.044e-06</b>    | 109                |
| LogG ~ LogML     | 0.981         | 2.061077         | 0.092797     | 0.02596                   | 0.0507              | 110                |
| LogG ~ LogPGR    | 0.982         | 2.196472         | 0.042242     | 0.01376                   | 0.1294              | 97                 |
| LogG ~ LogBBR    | 0.986         | 2.2048339        | 0.0093397    | -0.008399                 | 0.7518              | 109                |

| Call                | Lambda | Intercept | Slope     | Adjusted R-squared | p-value             | Sample size |
|---------------------|--------|-----------|-----------|--------------------|---------------------|-------------|
| LogBrain<br>~ LogML | 0.974  | 0.51277   | 0.64228   | 0.1207             | <b>0.0001035</b>    | 112         |
| LogBrain<br>~LogPGR | 0.841  | 1.517949  | 0.881683  | 0.6215             | <b>&lt; 2.2e-16</b> | 90          |
| LogBBR~<br>LogBrain | 0.845  | -1.531256 | -0.189017 | 0.06532            | 0.0015              | 137         |
| EQ ~<br>LogBrain    | 0.662  | 0.20624   | 1.08618   | 0.1914             | <b>5.376e-08</b>    | 137         |
| LogML ~<br>LogPGR   | 0.715  | 1.510051  | 0.260417  | 0.2859             | <b>2.405e-08</b>    | 92          |
| LogML ~<br>LogBBR   | 0.949  | 1.541035  | 0.044323  | -0.004429          | 0.4764              | 112         |
| LogML ~<br>EQ       | 0.902  | 1.359893  | 0.059295  | 0.1419             | <b>2.516e-05</b>    | 112         |
| LogPGR<br>~LogBBR   | 0.985  | -0.69394  | -0.21420  | 0.0337             | <u>0.04582</u>      | 90          |
| EQ ~<br>LogPGR      | 0.038  | 1.85731   | 0.89814   | 0.2493             | <b>3.279e-07</b>    | 90          |
| LogBBR<br>~ EQ      | 0.991  | -2.060926 | 0.195592  | 0.6631             | <b>&lt; 2.2e-16</b> | 137         |

## LogLS & LogG

Call:

pgls(formula = LogLS ~ LogG, data = primate, lambda = "ML")

Residuals:

```

      Min      1Q  Median      3Q      Max
-0.088817 -0.010366 -0.000868  0.008572  0.078541

```

Branch length transformations:

```

kappa [Fix] : 1.000
lambda [ ML] : 1.000
  lower bound : 0.000, p = < 2.22e-16
  upper bound : 1.000, p = 1
  95.0% CI   : (0.993, NA)
delta [Fix] : 1.000

```

Coefficients:

```

      Estimate Std. Error t value Pr(>|t|)
(Intercept)  0.846825   0.217735  3.8892 0.0001668 ***
LogG        -0.367564   0.092453 -3.9757 0.0001214 ***
---

```

Signif. codes: 0 '\*\*\*' 0.001 '\*\*' 0.01 '\*' 0.05 '.' 0.1 ' ' 1

Residual standard error: 0.02101 on 118 degrees of freedom

Multiple R-squared: 0.1181, Adjusted R-squared: 0.1107

F-statistic: 15.81 on 1 and 118 DF, p-value: 0.0001214

### LogLS & LogML

Call:

```
pgls(formula = LogLS ~ LogML, data = primate, lambda = "ML")
```

Residuals:

| Min       | 1Q        | Median    | 3Q       |
|-----------|-----------|-----------|----------|
| -0.057168 | -0.013863 | -0.001327 | 0.007508 |
| Max       |           |           |          |
| 0.087169  |           |           |          |

Branch length transformations:

kappa [Fix] : 1.000

lambda [ ML] : 1.000

lower bound : 0.000, p = < 2.22e-16

upper bound : 1.000, p = 1

95.0% CI : (0.997, NA)

delta [Fix] : 1.000

Coefficients:

|                  | Estimate  | Std. Error |
|------------------|-----------|------------|
| (Intercept)      | 0.121217  | 0.104730   |
| LogML            | -0.042479 | 0.036703   |
| t value Pr(> t ) |           |            |
| (Intercept)      | 1.1574    | 0.2494     |
| LogML            | -1.1574   | 0.2494     |

Residual standard error: 0.02111 on 122 degrees of freedom

Multiple R-squared: 0.01086, Adjusted R-squared: 0.002752

F-statistic: 1.339 on 1 and 122 DF, p-value: 0.2494

### LogLS & ML

Call:

```
pgls(formula = LogLS ~ ML, data = primate, lambda = "ML")
```

Residuals:

| Min       | 1Q        | Median    | 3Q       |
|-----------|-----------|-----------|----------|
| -0.056933 | -0.014292 | -0.000824 | 0.007273 |

Max  
0.087295

Branch length transformations:

kappa [Fix] : 1.000  
lambda [ ML] : 1.000  
lower bound : 0.000, p = < 2.22e-16  
upper bound : 1.000, p = 1  
95.0% CI : (0.997, NA)  
delta [Fix] : 1.000

Coefficients:

|             | Estimate    | Std. Error |
|-------------|-------------|------------|
| (Intercept) | 0.06903496  | 0.09136551 |
| ML          | -0.00031158 | 0.00043179 |

  

|             | t value | Pr(> t ) |
|-------------|---------|----------|
| (Intercept) | 0.7556  | 0.4514   |
| ML          | -0.7216 | 0.4719   |

Residual standard error: 0.02119 on 122 degrees of freedom  
Multiple R-squared: 0.00425, Adjusted R-squared: -0.003912  
F-statistic: 0.5207 on 1 and 122 DF, p-value: 0.4719

## LS & ML

Call:

pgls(formula = LS ~ ML, data = primate, lambda = "ML")

Residuals:

| Min       | 1Q        | Median    | 3Q       |
|-----------|-----------|-----------|----------|
| -0.188234 | -0.048909 | -0.002971 | 0.025613 |

Max  
0.287259

Branch length transformations:

kappa [Fix] : 1.000  
lambda [ ML] : 1.000  
lower bound : 0.000, p = < 2.22e-16  
upper bound : 1.000, p = 1  
95.0% CI : (0.996, NA)  
delta [Fix] : 1.000

Coefficients:

| Estimate | Std. Error |
|----------|------------|
|----------|------------|

```
(Intercept) 1.2244236 0.3071618
ML          -0.0011492 0.0014516
           t value Pr(>|t|)
```

```
(Intercept) 3.9862 0.0001148 ***
ML          -0.7916 0.4301134
```

---

Signif. codes:

```
0 '***' 0.001 '**' 0.01 '*' 0.05
'.' 0.1 ' ' 1
```

Residual standard error: 0.07122 on 122 degrees of freedom

Multiple R-squared: 0.00511, Adjusted R-squared: -0.003044

F-statistic: 0.6267 on 1 and 122 DF, p-value: 0.4301

### LogLS & LogAW

Call:

```
pgls(formula = LogLS ~ LogAW, data = primate, lambda = "ML")
```

Residuals:

```
      Min      1Q   Median      3Q      Max
-0.070803 -0.008751 -0.000025  0.006646
0.074900
```

Branch length transformations:

kappa [Fix] : 1.000

lambda [ ML] : 1.000

lower bound : 0.000, p = < 2.22e-16

upper bound : 1.000, p = 1

95.0% CI : (0.997, NA)

delta [Fix] : 1.000

Coefficients:

```
      Estimate Std. Error
(Intercept) 0.074201 0.087865
LogAW       -0.011529 0.014062
           t value Pr(>|t|)
(Intercept) 0.8445 0.3997
LogAW      -0.8199 0.4136
```

Residual standard error: 0.02025 on 149 degrees of freedom

Multiple R-squared: 0.004491, Adjusted R-squared: -0.00219

F-statistic: 0.6722 on 1 and 149 DF, p-value: 0.4136

## LogLS & LogBrain

Call:

```
pgls(formula = LogLS ~ LogBrain, data = primate, lambda = "ML")
```

Residuals:

| Min       | 1Q        | Median   | 3Q       |
|-----------|-----------|----------|----------|
| -0.072056 | -0.006088 | 0.000621 | 0.005812 |
| Max       |           |          |          |
| 0.068412  |           |          |          |

Branch length transformations:

kappa [Fix] : 1.000  
lambda [ ML] : 1.000  
lower bound : 0.000, p = < 2.22e-16  
upper bound : 1.000, p = 1  
95.0% CI : (0.997, NA)  
delta [Fix] : 1.000

Coefficients:

|             | Estimate  | Std. Error |
|-------------|-----------|------------|
| (Intercept) | 0.093679  | 0.082939   |
| LogBrain    | -0.044213 | 0.023953   |

t value Pr(>|t|)

|             |         |           |
|-------------|---------|-----------|
| (Intercept) | 1.1295  | 0.26069   |
| LogBrain    | -1.8458 | 0.06711 . |

---

Signif. codes:

0 '\*\*\*' 0.001 '\*\*' 0.01 '\*' 0.05  
'.' 0.1 ' ' 1

Residual standard error: 0.02034 on 135 degrees of freedom

Multiple R-squared: 0.02462, Adjusted R-squared: 0.01739

F-statistic: 3.407 on 1 and 135 DF, p-value: 0.06711

## LogLS & LogPGR

Call:

```
pgls(formula = LogLS ~ LogPGR, data = primate, lambda = "ML")
```

Residuals:

| Min       | 1Q        | Median    | 3Q       |
|-----------|-----------|-----------|----------|
| -0.070886 | -0.010195 | -0.000751 | 0.007482 |
| Max       |           |           |          |
| 0.075328  |           |           |          |

Branch length transformations:

kappa [Fix] : 1.000  
lambda [ ML] : 1.000  
lower bound : 0.000, p = < 2.22e-16  
upper bound : 1.000, p = 1  
95.0% CI : (0.994, NA)  
delta [Fix] : 1.000

Coefficients:

|             | Estimate  | Std. Error |
|-------------|-----------|------------|
| (Intercept) | 0.033493  | 0.089580   |
| LogPGR      | -0.061376 | 0.032567   |
|             | t value   | Pr(> t )   |
| (Intercept) | 0.3739    | 0.70932    |
| LogPGR      | -1.8846   | 0.06254 .  |

---

Signif. codes:

0 '\*\*\*' 0.001 '\*\*' 0.01 '\*' 0.05  
'.' 0.1 ' ' 1

Residual standard error: 0.02313 on 95 degrees of freedom  
Multiple R-squared: 0.03604, Adjusted R-squared: 0.02589  
F-statistic: 3.552 on 1 and 95 DF, p-value: 0.06254

## LogLS & LogBBR

Call:

pgls(formula = LogLS ~ LogBBR, data = primate, lambda = "ML")

Residuals:

| Min       | 1Q        | Median   | 3Q       |
|-----------|-----------|----------|----------|
| -0.081508 | -0.005739 | 0.000604 | 0.005736 |
| Max       |           |          |          |
| 0.067826  |           |          |          |

Branch length transformations:

kappa [Fix] : 1.000  
lambda [ ML] : 1.000  
lower bound : 0.000, p = < 2.22e-16  
upper bound : 1.000, p = 1  
95.0% CI : (0.998, NA)  
delta [Fix] : 1.000

Coefficients:

|             | Estimate   | Std. Error |
|-------------|------------|------------|
| (Intercept) | 0.0036346  | 0.0894784  |
| LogBBR      | -0.0205511 | 0.0244673  |

  

|             | t value | Pr(> t ) |
|-------------|---------|----------|
| (Intercept) | 0.0406  | 0.9677   |
| LogBBR      | -0.8399 | 0.4024   |

Residual standard error: 0.02055 on 135 degrees of freedom  
Multiple R-squared: 0.005199, Adjusted R-squared: -0.00217  
F-statistic: 0.7055 on 1 and 135 DF, p-value: 0.4024

### LogLS & BBR

Call:  
pgls(formula = LogLS ~ BBR, data = primate, lambda = "ML")

Residuals:

| Min       | 1Q        | Median   | 3Q       |
|-----------|-----------|----------|----------|
| -0.080908 | -0.005797 | 0.000314 | 0.005957 |
| Max       |           |          |          |
| 0.068466  |           |          |          |

Branch length transformations:

kappa [Fix] : 1.000  
lambda [ ML] : 1.000  
lower bound : 0.000, p = < 2.22e-16  
upper bound : 1.000, p = 1  
95.0% CI : (0.998, NA)  
delta [Fix] : 1.000

Coefficients:

|             | Estimate  | Std. Error |
|-------------|-----------|------------|
| (Intercept) | 0.047953  | 0.079329   |
| BBR         | -0.418883 | 0.600158   |

  

|             | t value | Pr(> t ) |
|-------------|---------|----------|
| (Intercept) | 0.6045  | 0.5465   |
| BBR         | -0.6980 | 0.4864   |

Residual standard error: 0.02056 on 135 degrees of freedom  
Multiple R-squared: 0.003595, Adjusted R-squared: -0.003785  
F-statistic: 0.4871 on 1 and 135 DF, p-value: 0.4864

### LogLS & EQ

Call:



```
pgls(formula = LogLS ~ EQ, data = primate, lambda = "ML")
```

Residuals:

| Min       | 1Q        | Median   | 3Q       | Max      |
|-----------|-----------|----------|----------|----------|
| -0.078828 | -0.006136 | 0.000365 | 0.006233 | 0.068201 |

Branch length transformations:

```
kappa [Fix] : 1.000
lambda [ ML] : 1.000
  lower bound : 0.000, p = < 2.22e-16
  upper bound : 1.000, p = 1
  95.0% CI   : (0.998, NA)
delta [Fix] : 1.000
```

Coefficients:

|             | Estimate   | Std. Error | t value | Pr(> t ) |
|-------------|------------|------------|---------|----------|
| (Intercept) | 0.0493281  | 0.0788595  | 0.6255  | 0.5327   |
| EQ          | -0.0062038 | 0.0060670  | -1.0225 | 0.3084   |

Residual standard error: 0.02052 on 135 degrees of freedom  
Multiple R-squared: 0.007686, Adjusted R-squared: 0.0003352  
F-statistic: 1.046 on 1 and 135 DF, p-value: 0.3084

### **LogAW & LogBrain (n=137)**

Call:

```
pgls(formula = LogAW ~ LogBrain, data = primate, lambda = "ML")
```

Residuals:

| Min       | 1Q        | Median    | 3Q       | Max      |
|-----------|-----------|-----------|----------|----------|
| -0.096146 | -0.018069 | -0.003223 | 0.022943 | 0.083372 |

Branch length transformations:

```
kappa [Fix] : 1.000
lambda [ ML] : 0.845
  lower bound : 0.000, p = 4.1256e-13
  upper bound : 1.000, p = 2.6201e-14
  95.0% CI   : (0.693, 0.930)
delta [Fix] : 1.000
```

Coefficients:

|             | Estimate | Std. Error | t value | Pr(> t )      |
|-------------|----------|------------|---------|---------------|
| (Intercept) | 1.531256 | 0.136965   | 11.180  | < 2.2e-16 *** |
| LogBrain    | 1.189017 | 0.058319   | 20.388  | < 2.2e-16 *** |

---

Signif. codes: 0 '\*\*\*' 0.001 '\*\*' 0.01 '\*' 0.05 '.' 0.1 ' ' 1

Residual standard error: 0.03285 on 135 degrees of freedom

Multiple R-squared: 0.7548, Adjusted R-squared: 0.753

F-statistic: 415.7 on 1 and 135 DF, p-value: < 2.2e-16

### LogBrain & LogAW (n=137)

Call:

pgls(formula = LogBrain ~ LogAW, data = primate, lambda = "ML")

Residuals:

| Min       | 1Q        | Median   | 3Q       |
|-----------|-----------|----------|----------|
| -0.076116 | -0.012451 | 0.002178 | 0.022179 |
| Max       |           |          |          |
| 0.102850  |           |          |          |

Branch length transformations:

kappa [Fix] : 1.000

lambda [ ML] : 0.914

lower bound : 0.000, p = < 2.22e-16

upper bound : 1.000, p = 5.3489e-11

95.0% CI : (0.811, 0.966)

delta [Fix] : 1.000

Coefficients:

|             | Estimate  | Std. Error |
|-------------|-----------|------------|
| (Intercept) | -0.591126 | 0.142001   |
| LogAW       | 0.607373  | 0.033179   |

  

|             | t value | Pr(> t )      |
|-------------|---------|---------------|
| (Intercept) | -4.1628 | 5.568e-05 *** |
| LogAW       | 18.3057 | < 2.2e-16 *** |

---

Signif. codes:

0 '\*\*\*' 0.001 '\*\*' 0.01 '\*' 0.05  
'.' 0.1 ' ' 1

Residual standard error: 0.0277 on 135 degrees of freedom

Multiple R-squared: 0.7128, Adjusted R-squared: 0.7107

F-statistic: 335.1 on 1 and 135 DF, p-value: < 2.2e-16

### LogAW & LogML (n=124)

Call:

```
pgls(formula = LogAW ~ LogML, data = primate, lambda = "ML")
```

Residuals:

| Min       | 1Q        | Median   | 3Q       |
|-----------|-----------|----------|----------|
| -0.226896 | -0.056882 | 0.003256 | 0.048479 |
| Max       |           |          |          |
| 0.215939  |           |          |          |

Branch length transformations:

kappa [Fix] : 1.000

lambda [ ML] : 0.955

lower bound : 0.000, p = < 2.22e-16

upper bound : 1.000, p = 2.1874e-06

95.0% CI : (0.892, 0.984)

delta [Fix] : 1.000

Coefficients:

|             | Estimate  | Std. Error | t value |
|-------------|-----------|------------|---------|
| (Intercept) | 2.25039   | 0.50131    | 4.4890  |
| LogML       | 0.70252   | 0.24520    | 2.8651  |
| Pr(> t )    |           |            |         |
| (Intercept) | 1.634e-05 | ***        |         |
| LogML       | 0.00491   | **         |         |

---

Signif. codes:

0 '\*\*\*' 0.001 '\*\*' 0.01 '\*' 0.05  
'.' 0.1 ' ' 1

Residual standard error: 0.08431 on 122 degrees of freedom

Multiple R-squared: 0.06305, Adjusted R-squared: 0.05537

F-statistic: 8.209 on 1 and 122 DF, p-value: 0.00491

### LogAW & LogG (n=120)

Call:

```
pgls(formula = LogAW ~ LogG, data = primate, lambda = "ML")
```

Residuals:

| Min      | 1Q       | Median  | 3Q      |
|----------|----------|---------|---------|
| -0.25936 | -0.04554 | 0.01236 | 0.06288 |
| Max      |          |         |         |

0.33515

Branch length transformations:

kappa [Fix] : 1.000  
lambda [ ML] : 0.953  
lower bound : 0.000, p = < 2.22e-16  
upper bound : 1.000, p = 4.5661e-06  
95.0% CI : (0.891, 0.984)  
delta [Fix] : 1.000

Coefficients:

|             | Estimate | Std. Error | t value |
|-------------|----------|------------|---------|
| (Intercept) | -0.96464 | 1.15838    | -0.8327 |
| LogG        | 1.80601  | 0.50898    | 3.5482  |

Pr(>|t|)  
(Intercept) 0.4066684  
LogG 0.0005576 \*\*\*

---

Signif. codes:

0 '\*\*\*' 0.001 '\*\*' 0.01 '\*' 0.05  
'.' 0.1 ' ' 1

Residual standard error: 0.08522 on 118 degrees of freedom  
Multiple R-squared: 0.09641, Adjusted R-squared: 0.08875  
F-statistic: 12.59 on 1 and 118 DF, p-value: 0.0005576

### **LogAW & LogPGR (n=97)**

Call:

pgls(formula = LogAW ~ LogPGR, data = primate, lambda = "ML")

Residuals:

| Min       | 1Q        | Median    | 3Q       |
|-----------|-----------|-----------|----------|
| -0.097210 | -0.028830 | -0.003171 | 0.022395 |
| Max       |           |           |          |
| 0.154280  |           |           |          |

Branch length transformations:

kappa [Fix] : 1.000  
lambda [ ML] : 0.660  
lower bound : 0.000, p = 0.00018792  
upper bound : 1.000, p = 2.3523e-12  
95.0% CI : (0.294, 0.860)  
delta [Fix] : 1.000

Coefficients:

|             | Estimate | Std. Error | t value |
|-------------|----------|------------|---------|
| (Intercept) | 3.405221 | 0.144050   | 23.639  |
| LogPGR      | 1.271542 | 0.098736   | 12.878  |

Pr(>|t|)

(Intercept) < 2.2e-16 \*\*\*  
LogPGR < 2.2e-16 \*\*\*

---

Signif. codes:

0 '\*\*\*' 0.001 '\*\*' 0.01 '\*' 0.05  
'.' 0.1 ' ' 1

Residual standard error: 0.04285 on 95 degrees of freedom  
Multiple R-squared: 0.6358, Adjusted R-squared: 0.632  
F-statistic: 165.8 on 1 and 95 DF, p-value: < 2.2e-16

### **LogAW & LogBBR (n=137)**

Call:

pgls(formula = LogAW ~ LogBBR, data = primate, lambda = "ML")

Residuals:

| Min      | 1Q       | Median  | 3Q      |
|----------|----------|---------|---------|
| -0.17202 | -0.02936 | 0.00409 | 0.03524 |
| Max      |          |         |         |
| 0.24815  |          |         |         |

Branch length transformations:

kappa [Fix] : 1.000  
lambda [ ML] : 0.988  
lower bound : 0.000, p = < 2.22e-16  
upper bound : 1.000, p = 0.00079534  
95.0% CI : (0.972, 0.996)  
delta [Fix] : 1.000

Coefficients:

|             | Estimate  | Std. Error |
|-------------|-----------|------------|
| (Intercept) | 0.975840  | 0.288575   |
| LogBBR      | -1.137380 | 0.093285   |

t value Pr(>|t|)

(Intercept) 3.3816 0.000943 \*\*\*  
LogBBR -12.1926 < 2.2e-16 \*\*\*

---

Signif. codes:

0 '\*\*\*' 0.001 '\*\*' 0.01 '\*' 0.05  
'.' 0.1 ' ' 1

Residual standard error: 0.06246 on 135 degrees of freedom  
Multiple R-squared: 0.5241, Adjusted R-squared: 0.5206  
F-statistic: 148.7 on 1 and 135 DF, p-value: < 2.2e-16

### LogAW & EQ (n=137)

Call:

pgls(formula = LogAW ~ EQ, data = primate, lambda = "ML")

Residuals:

| Min       | 1Q        | Median    | 3Q       |
|-----------|-----------|-----------|----------|
| -0.277889 | -0.060639 | -0.006442 | 0.040266 |
| Max       |           |           |          |
| 0.207793  |           |           |          |

Branch length transformations:

kappa [Fix] : 1.000  
lambda [ ML] : 0.991  
lower bound : 0.000, p = < 2.22e-16  
upper bound : 1.000, p = 0.0049564  
95.0% CI : (0.977, 0.998)  
delta [Fix] : 1.000

Coefficients:

|             | Estimate  | Std. Error   |
|-------------|-----------|--------------|
| (Intercept) | 3.128052  | 0.344453     |
| EQ          | -0.097092 | 0.030954     |
|             | t value   | Pr(> t )     |
| (Intercept) | 9.0812    | 1.11e-15 *** |
| EQ          | -3.1366   | 0.002098 **  |

---

Signif. codes:

0 '\*\*\*' 0.001 '\*\*' 0.01 '\*' 0.05  
'.' 0.1 ' ' 1

Residual standard error: 0.08973 on 135 degrees of freedom  
Multiple R-squared: 0.06793, Adjusted R-squared: 0.06102  
F-statistic: 9.838 on 1 and 135 DF, p-value: 0.002098

### LogG & LogBrain (n=109)

Call:

```
pgls(formula = LogG ~ LogBrain, data = primate, lambda = "ML")
```

Residuals:

| Min       | 1Q        | Median    | 3Q       |
|-----------|-----------|-----------|----------|
| -0.053831 | -0.007622 | -0.000323 | 0.008138 |
| Max       |           |           |          |
| 0.040662  |           |           |          |

Branch length transformations:

```
kappa [Fix] : 1.000
lambda [ ML] : 0.966
  lower bound : 0.000, p = < 2.22e-16
  upper bound : 1.000, p = 2.0126e-07
 95.0% CI   : (0.926, 0.987)
delta [Fix] : 1.000
```

Coefficients:

|             | Estimate  | Std. Error | t value |
|-------------|-----------|------------|---------|
| (Intercept) | 2.037712  | 0.062858   | 32.4179 |
| LogBrain    | 0.121734  | 0.023494   | 5.1816  |
| Pr(> t )    |           |            |         |
| (Intercept) | < 2.2e-16 | ***        |         |
| LogBrain    | 1.044e-06 | ***        |         |

---

Signif. codes:

0 '\*\*\*' 0.001 '\*\*' 0.01 '\*' 0.05  
'.' 0.1 ' ' 1

Residual standard error: 0.01471 on 107 degrees of freedom

Multiple R-squared: 0.2006, Adjusted R-squared: 0.1931

F-statistic: 26.85 on 1 and 107 DF, p-value: 1.044e-06

### **LogG & LogML (n=110)**

Call:

```
pgls(formula = LogG ~ LogML, data = primate, lambda = "ML")
```

Residuals:

| Min       | 1Q        | Median    | 3Q       |
|-----------|-----------|-----------|----------|
| -0.037432 | -0.012057 | -0.001836 | 0.011125 |
| Max       |           |           |          |
| 0.039577  |           |           |          |

Branch length transformations:

kappa [Fix] : 1.000  
lambda [ ML] : 0.981  
lower bound : 0.000, p = < 2.22e-16  
upper bound : 1.000, p = 7.0272e-05  
95.0% CI : (0.953, 0.995)  
delta [Fix] : 1.000

Coefficients:

|             | Estimate | Std. Error | t value |
|-------------|----------|------------|---------|
| (Intercept) | 2.061077 | 0.100015   | 20.608  |
| LogML       | 0.092797 | 0.046961   | 1.976   |

Pr(>|t|)

|             |            |
|-------------|------------|
| (Intercept) | <2e-16 *** |
| LogML       | 0.0507 .   |

---

Signif. codes:

0 '\*\*\*' 0.001 '\*\*' 0.01 '\*' 0.05  
'.' 0.1 ' ' 1

Residual standard error: 0.01722 on 108 degrees of freedom  
Multiple R-squared: 0.03489, Adjusted R-squared: 0.02596  
F-statistic: 3.905 on 1 and 108 DF, p-value: 0.0507

**LogG & LogPGR (n=97)**

Call:

pgls(formula = LogG ~ LogPGR, data = primate, lambda = "ML")

Residuals:

| Min       | 1Q        | Median   | 3Q       |
|-----------|-----------|----------|----------|
| -0.039478 | -0.006974 | 0.000346 | 0.007418 |
| Max       |           |          |          |
| 0.049534  |           |          |          |

Branch length transformations:

kappa [Fix] : 1.000  
lambda [ ML] : 0.982  
lower bound : 0.000, p = < 2.22e-16  
upper bound : 1.000, p = 0.0002189  
95.0% CI : (0.952, 0.995)  
delta [Fix] : 1.000

Coefficients:

|             | Estimate | Std. Error | t value |
|-------------|----------|------------|---------|
| (Intercept) | 2.196472 | 0.064111   | 34.2606 |



LogPGR 0.042242 0.027615 1.5297

Pr(>|t|)

(Intercept) <2e-16 \*\*\*

LogPGR 0.1294

---

Signif. codes:

0 '\*\*\*' 0.001 '\*\*' 0.01 '\*' 0.05

'.' 0.1 ' ' 1

Residual standard error: 0.01661 on 95 degrees of freedom

Multiple R-squared: 0.02404, Adjusted R-squared: 0.01376

F-statistic: 2.34 on 1 and 95 DF, p-value: 0.1294

### LogG & LogBBR (n=109)

Call:

pgls(formula = LogG ~ LogBBR, data = primate, lambda = "ML")

Residuals:

| Min       | 1Q        | Median    | 3Q       |
|-----------|-----------|-----------|----------|
| -0.043156 | -0.010030 | -0.000425 | 0.010007 |
| Max       |           |           |          |
| 0.058907  |           |           |          |

Branch length transformations:

kappa [Fix] : 1.000

lambda [ ML] : 0.986

lower bound : 0.000, p = < 2.22e-16

upper bound : 1.000, p = 0.001957

95.0% CI : (0.962, 0.997)

delta [Fix] : 1.000

Coefficients:

Estimate Std. Error

(Intercept) 2.2048339 0.0859436

LogBBR 0.0093397 0.0294593

t value Pr(>|t|)

(Intercept) 25.654 <2e-16 \*\*\*

LogBBR 0.317 0.7518

---

Signif. codes:

0 '\*\*\*' 0.001 '\*\*' 0.01 '\*' 0.05

'.' 0.1 ' ' 1

Residual standard error: 0.01803 on 107 degrees of freedom

Multiple R-squared: 0.0009385, Adjusted R-squared: -0.008399  
F-statistic: 0.1005 on 1 and 107 DF, p-value: 0.7518

### LogBrain & LogML (n=112)

Call:

pgls(formula = LogBrain ~ LogML, data = primate, lambda = "ML")

Residuals:

| Min       | 1Q        | Median    | 3Q       |
|-----------|-----------|-----------|----------|
| -0.161036 | -0.034281 | -0.002672 | 0.023721 |
| Max       |           |           |          |
| 0.198902  |           |           |          |

Branch length transformations:

kappa [Fix] : 1.000  
lambda [ ML] : 0.974  
lower bound : 0.000, p = < 2.22e-16  
upper bound : 1.000, p = 1.8891e-05  
95.0% CI : (0.937, 0.991)  
delta [Fix] : 1.000

Coefficients:

|             | Estimate | Std. Error | t value |
|-------------|----------|------------|---------|
| (Intercept) | 0.51277  | 0.33338    | 1.5381  |
| LogML       | 0.64228  | 0.15943    | 4.0287  |

Pr(>|t|)

|             |               |
|-------------|---------------|
| (Intercept) | 0.1268978     |
| LogML       | 0.0001035 *** |

---

Signif. codes:

0 '\*\*\*' 0.001 '\*\*' 0.01 '\*' 0.05  
'.' 0.1 ' ' 1

Residual standard error: 0.05659 on 110 degrees of freedom  
Multiple R-squared: 0.1286, Adjusted R-squared: 0.1207  
F-statistic: 16.23 on 1 and 110 DF, p-value: 0.0001035

### LogBrain & LogPGR (n=90)

Call:

pgls(formula = LogBrain ~ LogPGR, data = primate, lambda = "ML")

Residuals:

| Min       | 1Q        | Median   | 3Q       |
|-----------|-----------|----------|----------|
| -0.055050 | -0.022065 | 0.002469 | 0.018858 |

Max  
0.121758

Branch length transformations:

kappa [Fix] : 1.000  
lambda [ ML] : 0.841  
lower bound : 0.000, p = 1.7012e-05  
upper bound : 1.000, p = 2.0862e-11  
95.0% CI : (0.608, 0.940)  
delta [Fix] : 1.000

Coefficients:

|             | Estimate | Std. Error | t value |
|-------------|----------|------------|---------|
| (Intercept) | 1.517949 | 0.122358   | 12.406  |
| LogPGR      | 0.881683 | 0.072689   | 12.130  |

Pr(>|t|)  
(Intercept) < 2.2e-16 \*\*\*  
LogPGR < 2.2e-16 \*\*\*

---

Signif. codes:

0 '\*\*\*' 0.001 '\*\*' 0.01 '\*' 0.05  
'.' 0.1 ' ' 1

Residual standard error: 0.03332 on 88 degrees of freedom  
Multiple R-squared: 0.6257, Adjusted R-squared: 0.6215  
F-statistic: 147.1 on 1 and 88 DF, p-value: < 2.2e-16

### **LogBBR & LogBrain (n=137)**

Call:

pgls(formula = LogBBR ~ LogBrain, data = primate, lambda = "ML")

Residuals:

| Min       | 1Q        | Median   | 3Q       | Max      |
|-----------|-----------|----------|----------|----------|
| -0.092284 | -0.023197 | 0.001969 | 0.019724 | 0.096146 |

Branch length transformations:

kappa [Fix] : 1.000  
lambda [ ML] : 0.845  
lower bound : 0.000, p = 4.1256e-13  
upper bound : 1.000, p = 2.6201e-14  
95.0% CI : (0.693, 0.930)  
delta [Fix] : 1.000

Coefficients:

|             | Estimate  | Std. Error | t value  | Pr(> t )   |
|-------------|-----------|------------|----------|------------|
| (Intercept) | -1.531256 | 0.136965   | -11.1799 | <2e-16 *** |
| LogBrain    | -0.189017 | 0.058319   | -3.2411  | 0.0015 **  |

---

Signif. codes: 0 '\*\*\*' 0.001 '\*\*' 0.01 '\*' 0.05 '.' 0.1 ' ' 1

Residual standard error: 0.03285 on 135 degrees of freedom

Multiple R-squared: 0.07219, Adjusted R-squared: 0.06532

F-statistic: 10.5 on 1 and 135 DF, p-value: 0.0015

### **EQ & LogBrain (n=137)**

Call:

pgls(formula = EQ ~ LogBrain, data = primate, lambda = "ML")

Residuals:

| Min      | 1Q       | Median  | 3Q      |
|----------|----------|---------|---------|
| -0.32904 | -0.04317 | 0.00137 | 0.04874 |
| Max      |          |         |         |
| 0.45589  |          |         |         |

Branch length transformations:

kappa [Fix] : 1.000

lambda [ ML] : 0.662

lower bound : 0.000, p = 3.4471e-05

upper bound : 1.000, p = 2.1461e-13

95.0% CI : (0.336, 0.849)

delta [Fix] : 1.000

Coefficients:

|             | Estimate | Std. Error | t value | Pr(> t )      |
|-------------|----------|------------|---------|---------------|
| (Intercept) | 0.20624  | 0.39360    | 0.524   | 0.6012        |
| LogBrain    | 1.08618  | 0.18851    | 5.762   | 5.376e-08 *** |

---

Signif. codes:

0 '\*\*\*' 0.001 '\*\*' 0.01 '\*' 0.05  
'.' 0.1 ' ' 1

Residual standard error: 0.09865 on 135 degrees of freedom

Multiple R-squared: 0.1974, Adjusted R-squared: 0.1914

F-statistic: 33.2 on 1 and 135 DF, p-value: 5.376e-08

### LogML & LogPGR (n=92)

Call:

```
pgls(formula = LogML ~ LogPGR, data = primate, lambda = "ML")
```

Residuals:

| Min       | 1Q        | Median   | 3Q       |
|-----------|-----------|----------|----------|
| -0.055054 | -0.010510 | 0.001511 | 0.012689 |
| Max       |           |          |          |
| 0.040706  |           |          |          |

Branch length transformations:

kappa [Fix] : 1.000  
lambda [ ML] : 0.715  
lower bound : 0.000, p = 0.00016903  
upper bound : 1.000, p = 1.9276e-08  
95.0% CI : (0.271, 0.941)  
delta [Fix] : 1.000

Coefficients:

|             | Estimate  | Std. Error | t value |
|-------------|-----------|------------|---------|
| (Intercept) | 1.510051  | 0.066984   | 22.5434 |
| LogPGR      | 0.260417  | 0.042560   | 6.1188  |
| Pr(> t )    |           |            |         |
| (Intercept) | < 2.2e-16 | ***        |         |
| LogPGR      | 2.405e-08 | ***        |         |

---

Signif. codes:

0 '\*\*\*' 0.001 '\*\*' 0.01 '\*' 0.05  
'.' 0.1 ' ' 1

Residual standard error: 0.01805 on 90 degrees of freedom

Multiple R-squared: 0.2938, Adjusted R-squared: 0.2859

F-statistic: 37.44 on 1 and 90 DF, p-value: 2.405e-08

### LogML & LogBBR (n=112)

Call:

```
pgls(formula = LogML ~ LogBBR, data = primate, lambda = "ML")
```

Residuals:

| Min       | 1Q        | Median    | 3Q       |
|-----------|-----------|-----------|----------|
| -0.081016 | -0.021992 | -0.003466 | 0.011257 |
| Max       |           |           |          |

0.073921

Branch length transformations:

kappa [Fix] : 1.000  
lambda [ ML] : 0.949  
lower bound : 0.000, p = < 2.22e-16  
upper bound : 1.000, p = 2.1771e-13  
95.0% CI : (0.873, 0.981)  
delta [Fix] : 1.000

Coefficients:

|             | Estimate | Std. Error | t value |
|-------------|----------|------------|---------|
| (Intercept) | 1.541035 | 0.168596   | 9.1404  |
| LogBBR      | 0.044323 | 0.062033   | 0.7145  |

Pr(>|t|)

|             |               |
|-------------|---------------|
| (Intercept) | 3.553e-15 *** |
| LogBBR      | 0.4764        |

---

Signif. codes:

0 '\*\*\*' 0.001 '\*\*' 0.01 '\*' 0.05  
'.' 0.1 ' ' 1

Residual standard error: 0.03001 on 110 degrees of freedom  
Multiple R-squared: 0.00462, Adjusted R-squared: -0.004429  
F-statistic: 0.5105 on 1 and 110 DF, p-value: 0.4764

### LogML & EQ (n=112)

Call:

pgls(formula = LogML ~ EQ, data = primate, lambda = "ML")

Residuals:

| Min       | 1Q        | Median    | 3Q       |
|-----------|-----------|-----------|----------|
| -0.073923 | -0.015123 | -0.000019 | 0.010907 |
| Max       |           |           |          |
| 0.050589  |           |           |          |

Branch length transformations:

kappa [Fix] : 1.000  
lambda [ ML] : 0.902  
lower bound : 0.000, p = 2.7528e-11  
upper bound : 1.000, p = 2.2204e-16  
95.0% CI : (0.756, 0.964)  
delta [Fix] : 1.000

Coefficients:

|             | Estimate | Std. Error | t value |
|-------------|----------|------------|---------|
| (Intercept) | 1.359893 | 0.101489   | 13.3994 |
| EQ          | 0.059295 | 0.013476   | 4.3999  |

Pr(>|t|)

|             |               |
|-------------|---------------|
| (Intercept) | < 2.2e-16 *** |
| EQ          | 2.516e-05 *** |

---

Signif. codes:

0 '\*\*\*' 0.001 '\*\*' 0.01 '\*' 0.05  
'.' 0.1 ' ' 1

Residual standard error: 0.02428 on 110 degrees of freedom

Multiple R-squared: 0.1497, Adjusted R-squared: 0.1419

F-statistic: 19.36 on 1 and 110 DF, p-value: 2.516e-05

### LogPGR & LogBBR (n=90)

Call:

pgls(formula = LogPGR ~ LogBBR, data = primate, lambda = "ML")

Residuals:

| Min      | 1Q       | Median  | 3Q      |
|----------|----------|---------|---------|
| -0.13410 | -0.02582 | 0.01286 | 0.04491 |
| Max      |          |         |         |
| 0.20789  |          |         |         |

Branch length transformations:

kappa [Fix] : 1.000

lambda [ ML] : 0.985

lower bound : 0.000, p = < 2.22e-16

upper bound : 1.000, p = 0.013683

95.0% CI : (0.949, 0.998)

delta [Fix] : 1.000

Coefficients:

|             | Estimate | Std. Error | t value |
|-------------|----------|------------|---------|
| (Intercept) | -0.69394 | 0.30076    | -2.3073 |
| LogBBR      | -0.21420 | 0.10574    | -2.0257 |

Pr(>|t|)

|             |           |
|-------------|-----------|
| (Intercept) | 0.02339 * |
| LogBBR      | 0.04582 * |

---

Signif. codes:

0 '\*\*\*' 0.001 '\*\*' 0.01 '\*' 0.05  
'.' 0.1 ' ' 1

Residual standard error: 0.06207 on 88 degrees of freedom  
Multiple R-squared: 0.04455, Adjusted R-squared: 0.0337  
F-statistic: 4.103 on 1 and 88 DF, p-value: 0.04582

### EQ & LogPGR (n=90)

Call:

pgls(formula = EQ ~ LogPGR, data = primate, lambda = "ML")

Residuals:

| Min      | 1Q       | Median   | 3Q      |
|----------|----------|----------|---------|
| -0.28910 | -0.04575 | -0.01987 | 0.03422 |
| Max      |          |          |         |
| 0.18054  |          |          |         |

Branch length transformations:

kappa [Fix] : 1.000  
lambda [ ML] : 0.038  
lower bound : 0.000, p = 0.62625  
upper bound : 1.000, p = 9.1526e-12  
95.0% CI : (NA, 0.483)  
delta [Fix] : 1.000

Coefficients:

|             | Estimate | Std. Error | t value |
|-------------|----------|------------|---------|
| (Intercept) | 1.85731  | 0.10782    | 17.2261 |
| LogPGR      | 0.89814  | 0.16250    | 5.5271  |

Pr(>|t|)  
(Intercept) < 2.2e-16 \*\*\*  
LogPGR 3.279e-07 \*\*\*

---

Signif. codes:

0 '\*\*\*' 0.001 '\*\*' 0.01 '\*' 0.05  
'.' 0.1 ' ' 1

Residual standard error: 0.08616 on 88 degrees of freedom  
Multiple R-squared: 0.2577, Adjusted R-squared: 0.2493  
F-statistic: 30.55 on 1 and 88 DF, p-value: 3.279e-07

### LogBBR & EQ (n=137)

Call:



```
pgls(formula = LogBBR ~ EQ, data = primate, lambda = "ML")
```

Residuals:

| Min       | 1Q        | Median   | 3Q       |
|-----------|-----------|----------|----------|
| -0.090680 | -0.022400 | 0.000023 | 0.020371 |
| Max       |           |          |          |
| 0.093870  |           |          |          |

Branch length transformations:

```
kappa [Fix] : 1.000
lambda [ ML] : 0.991
  lower bound : 0.000, p = < 2.22e-16
  upper bound : 1.000, p = 0.003732
  95.0% CI   : (0.972, 0.998)
delta [Fix] : 1.000
```

Coefficients:

|             | Estimate  | Std. Error |
|-------------|-----------|------------|
| (Intercept) | -2.060926 | 0.132463   |
| EQ          | 0.195592  | 0.011934   |

t value Pr(>|t|)

|             |         |           |     |
|-------------|---------|-----------|-----|
| (Intercept) | -15.559 | < 2.2e-16 | *** |
| EQ          | 16.390  | < 2.2e-16 | *** |

---

Signif. codes:

0 '\*\*\*' 0.001 '\*\*' 0.01 '\*' 0.05  
'.' 0.1 ' ' 1

Residual standard error: 0.03451 on 135 degrees of freedom

Multiple R-squared: 0.6655, Adjusted R-squared: 0.6631

F-statistic: 268.6 on 1 and 135 DF, p-value: < 2.2e-16
